# Supplementary material for: Comprehension-Oriented Learning of Cell Biology: Do Different Training Conditions Affect Students’ Learning Success Differentially?
Source: MDPI journal article supplement (doi:10.3390/educsci11080438), 2021-08-17
Supplement: s1 [file s1]

Archive with 2 entries (2 files):
- Supplementary Material Index.pdf
- Supplementary Material.pdf
