# Supplementary material for: Comprehension-Oriented Learning of Cell Biology: Do Different Training Conditions Affect Students’ Learning Success Differentially?
Source: MDPI journal article supplement (doi:10.3390/educsci11080438), 2021-08-17
Supplement: s1 [file s1 › Supplementary Material Index.pdf]

## **Supplementary Material Index**

- 1. Coding Manual for the Preliminary Questionnaire**
  - 1.1. Prior Knowledge in Cell Biology**
  - 1.2. Familiarity with Concept Maps**
  - 1.3. Demographics**
- 2. Scaffolds, Prompts, and Feedback for Group T++**
  - 2.1. Scaffold (Training Day 1; Group T++): Skeleton Map**
  - 2.2. Scaffold (Training Day 2; Group T++): Set of 12 Main Concepts**
  - 2.3. Metacognitive Prompts (Training Day 1 and 2; Group T++)**
  - 2.4. Metacognitive prompts (Training Day 3; Group T++)**
  - 2.5. Scaffold (Training Days 1, 2 and 3; Group T++): Catalogue of Common Mistakes – Concept Maps (page 1 of 2)**
  - 2.6. Scaffold (Training Days 1, 2 and 3; Group T++): Catalogue of Common Mistakes – Concept Maps (page 2 of 2)**
- 3. Scaffolds and Prompts for Group T–**
  - 3.1. Scaffold and Prompts (Training Day 1; Group T–): Tips and Tasks for the Small Group Discussion**
  - 3.2. Scaffold and Prompts (Training Day 2; Group T–): Tips and Tasks for Writing a Summary**
  - 3.3. Scaffold and Prompts (Training Day 3; Group T–): Tips and Tasks for the Carousel Workshops**
- 4. Coding Manual for the Treatment Check After the Trainingphase**
- 5. Coding Manual for the Concept Mapping Self-Efficacy Questionnaire**
- 6. CM Familiarity Treatment Check**
- 7. Learning Booklet for the Individual Learning Phase**
- 8. Coding Manual for the Cognitive Load Questionnaire**
- 9. Coding Manual for the Structural Knowledge Test**
- 10. Coding Manual for the Declarative Knowledge Test**
- 11. Coding Manual for the Conceptual Knowledge Test**
